# Supplementary material for: The cytochrome P450 family in the parasitic nematode Haemonchus contortus
Source: PubMed Central journal article supplement (PMC4365919; doi:10.1016/j.ijpara.2014.12.001), 2015-03

**A**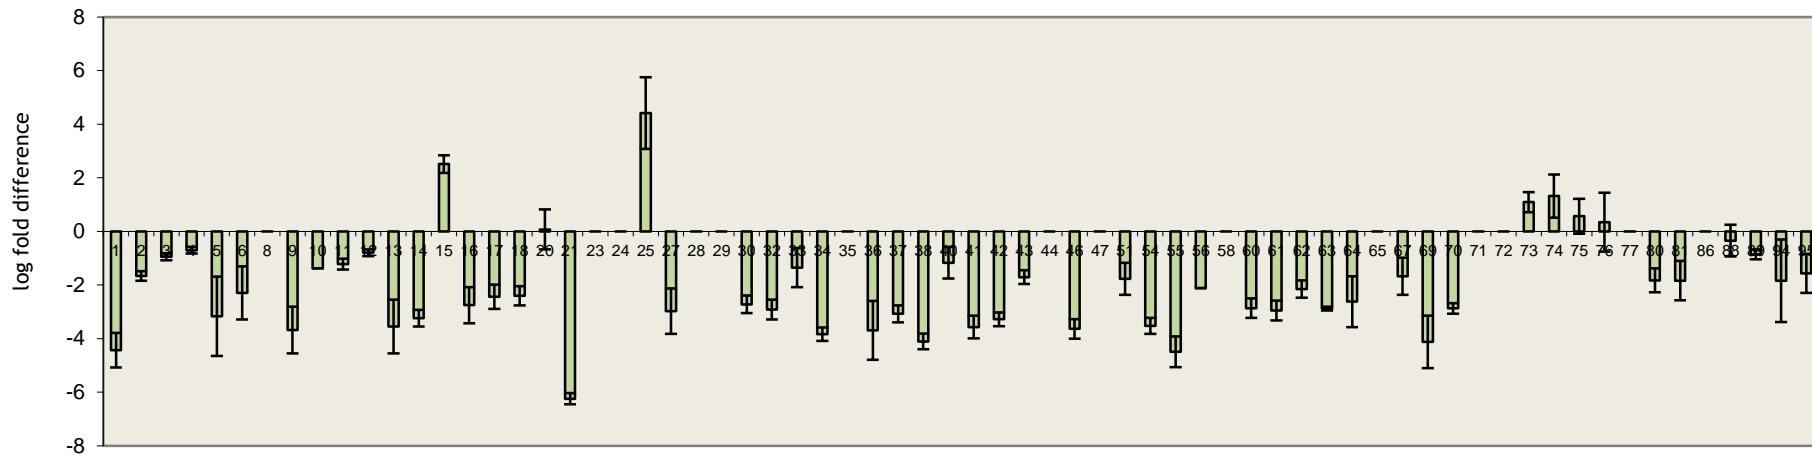**B**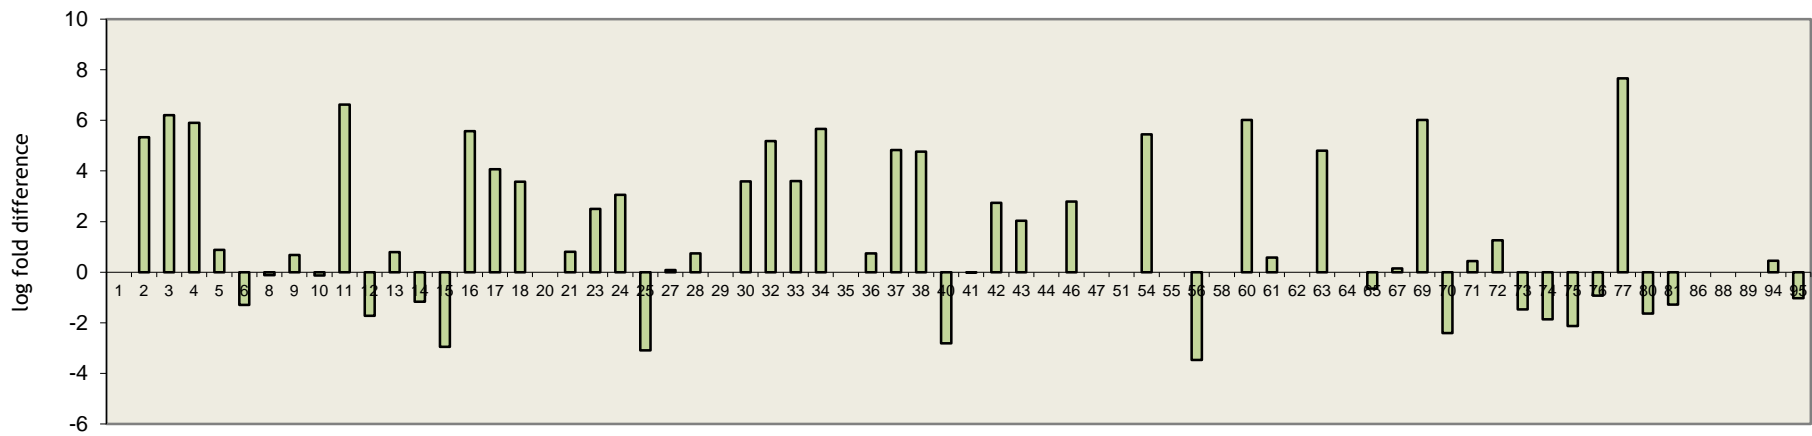

Supplement: mmc1.pdf [file mmc1.pdf]
