# Supplementary material for: The cytochrome P450 family in the parasitic nematode Haemonchus contortus
Source: PubMed Central journal article supplement (PMC4365919; doi:10.1016/j.ijpara.2014.12.001), 2015-03
Supplement: mmc2.pdf [file mmc2.pdf]

A. *C. elegans cyp31a2*

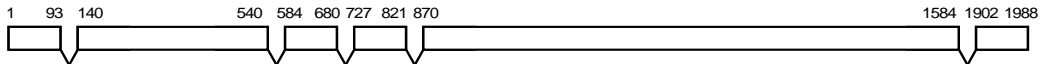

*C. elegans cyp31a3*

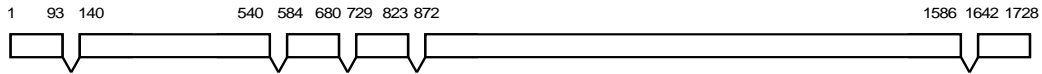

HCOI01579500

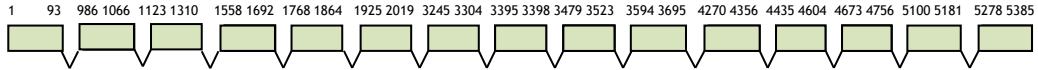

B.

|              |                                                                                                                  |     |
|--------------|------------------------------------------------------------------------------------------------------------------|-----|
| Ce-CYP31A2   | MGV IIPAVLLAMATVIAWLLYKHLRMRQVLKHLNQPRSYPIVGHGLITKPDPEGF MNQVI                                                   | 60  |
| Ce-CYP31A3   | MGV IIPAVLLASATIIAWLLYKHLRMRQALKHLNQPRSYPIVGHGLVTKPDPEGF MNQVI                                                   | 60  |
| HCOI01579500 | MGLLSAFLFVTIVTSIVYFIAKHLQLRNQLKGINCPRSYP LIGHGLLK KPDMEGF INQVM                                                  | 60  |
|              | ***: : . : : : * * : : : * : : * : * : : * : : * : * : * : : * : * : * : : * : *                                 |     |
|              |                                                                                                                  |     |
| Ce-CYP31A2   | GMGYLYPD-PRMCLLWIGFPPCLM LYSADLVEPIFSSTKHLNKGFAYV LLEPWLGISILT                                                   | 119 |
| Ce-CYP31A3   | GMGYLYPD-PRMCLLWIGFPPCLM LYSADLVEPIFSSTKHLNKGFAYV LLEPWLGISILT                                                   | 119 |
| HCOI01579500 | GMAQMYDSDPRMVLFVWLGPVVM LYSARLVEKILNCSQH LNKGIAYYFFESWL GQGIIT                                                   | 120 |
|              | ** : : *** ** * : * : * * * : * * : * : : * : * : * : * : * : * : * : *                                          |     |
|              |                                                                                                                  |     |
| Ce-CYP31A2   | SQKEQWRP K R K L L T P F F H Y D I L K D F L P I F N E Q S K I L V Q K L C C L G A D E E V D V L S V I T L C T L | 179 |
| Ce-CYP31A3   | SQKEQWRP K R K L L T P F F H Y D I L K D F L P I F N E Q S K I L V Q K M C S L G A E E E V D V L S V I T L C T L | 179 |
| HCOI01579500 | SNVDNWRP K R K L L T P F F H Y D I L K D F V P I F N D Q A Q I L V K K F A S L P E G K P V E L M S Y I T L C A L | 180 |
|              | * : : * : * : * : * : * : * : * : * : * : * : * : * : * : * : * : * : * : * : * : * : *                          |     |
|              |                                                                                                                  |     |
| Ce-CYP31A2   | DIICETSMGKAIGAQLAENNEYVWAVHTINKLISKRTNNPLMWSFIY NLTEDGRTHEKC                                                     | 239 |
| Ce-CYP31A3   | DIICETSMGKAIGAQLAENNEYVWAVHTINKLISKRTNNPLMWSFIY NLTEDGRTHEKC                                                     | 239 |
| HCOI01579500 | DIICETSMGKSLNAQLDKESEYV KAVHTVNDLVQKR T K S P L Y W N D Y F Y N K F G E G E T E K K C                            | 240 |
|              | ***** : : * * * : : * * * * * * : * : * : * : * : * * * : * * : * : * : *                                        |     |
|              |                                                                                                                  |     |
| Ce-CYP31A2   | LRILHDFTKKVIVERKEALQENDYKMEGR LAFLDLLLE MVKSGQMD ETDVQAEVDTFMFE                                                  | 299 |
| Ce-CYP31A3   | LRILHDFTKKVIVERKEALQENDYKMEGR LAFLDLLLE MVKSGQMD ETDVQAEVDTFMFE                                                  | 299 |
| HCOI01579500 | IDILHSFTNKVIAERRKELEDKQWRFEGRR AFLDLLLDMANGSGL EASEIQEQVDTLMFA                                                   | 300 |
|              | : * : * * : * * * : * : * : : * * * * * * * * : * : * : * : * : * : * : * : *                                    |     |
|              |                                                                                                                  |     |
| Ce-CYP31A2   | GHDTTSTGLMWAHLLGNHPEVQRKVQAE LDEVMG DDEDVTIEHLSRMKYLECALKEALR                                                    | 359 |
| Ce-CYP31A3   | GHDTTSTGLMWAHLLGNHPEVQRKVQAE LDEVMG DDEDVTIEHLSRMKYLECALKEALR                                                    | 359 |
| HCOI01579500 | GHDTTSTGSSWALFLFGCYPEIQRKVQEEI DEVLEDSYI LPEHLPR LKYLECLKESLR                                                    | 360 |
|              | ***** * : * : * : * * * * * * : * : * : * : * : * : * : * : * : * : * : *                                        |     |
|              |                                                                                                                  |     |
| Ce-CYP31A2   | LFPSPVPIITRELSDDQVIGGVNIPKGVTF LLNL YLVHRDPAQWKDPDVFDPDRFLPENSI                                                  | 419 |
| Ce-CYP31A3   | LFPSPVPIITRELSDDQVIGGVNIPKGVTF LLNL YLVHRDPSQWKDPDVFDPDRFLPENSI                                                  | 419 |
| HCOI01579500 | LCTFPVMIMRKL GADQELGV TLPKGTQVVL NQY MVHRDPMYWPDFEKFDPDRFLPENCI                                                  | 420 |
|              | * . . . . * * : * * : * * * : * * * : * * * : * * * : * * * : * * * : *                                          |     |
|              |                                                                                                                  |     |
| Ce-CYP31A2   | GRKSFAPFPFSAGSRNCIGQRFALMEEKVIMAHLLRN FNKAVELMHEVRPKMEII VRPV                                                    | 479 |
| Ce-CYP31A3   | ARKSFAPFPFSAGSRNCIGQRFALMEEKVIMAHLLRN FNVKAVELMHEVRPKMEII VRPV                                                   | 479 |
| HCOI01579500 | GRHFPAPFPFSAGSRNCIGQRFGLMEIKV VVSWMLRHFNVTAVQRRCDL KSKIEIILRPQ                                                   | 480 |
|              | * . * . ***** * * * : : * : * : * : * : * : * : * : * : * : * : *                                                |     |
|              |                                                                                                                  |     |
| Ce-CYP31A2   | TPIHMKLTRRRPIVSP-----                                                                                            | 495 |
| Ce-CYP31A3   | TPIHMKLTRRRPIVSP-----                                                                                            | 495 |
| HCOI01579500 | DGIVFLEKRRAIADGFRSSLIA                                                                                           | 503 |
|              | ** : * : * * : * . . .                                                                                           |     |
